# Supplementary material
Source: bioRxiv or medRxiv preprint supplement (https://medrxiv.org/highwire/filestream/77155/field_highwire_adjunct_files/0/2020.04.16.20067496-1.pdf)
Supplement: Supplementary file [file 2020.04.16.20067496-1.pdf]

# Supplementary Information

## Seasonality

In Figure S1, we present plots analogous to Figure 1.b in the main text, calculated for four representative months: January, representing winter and corresponding to the period when the COVID-19 outbreak started; April, representing spring ; July, for the summer period ; and October representing autumn.

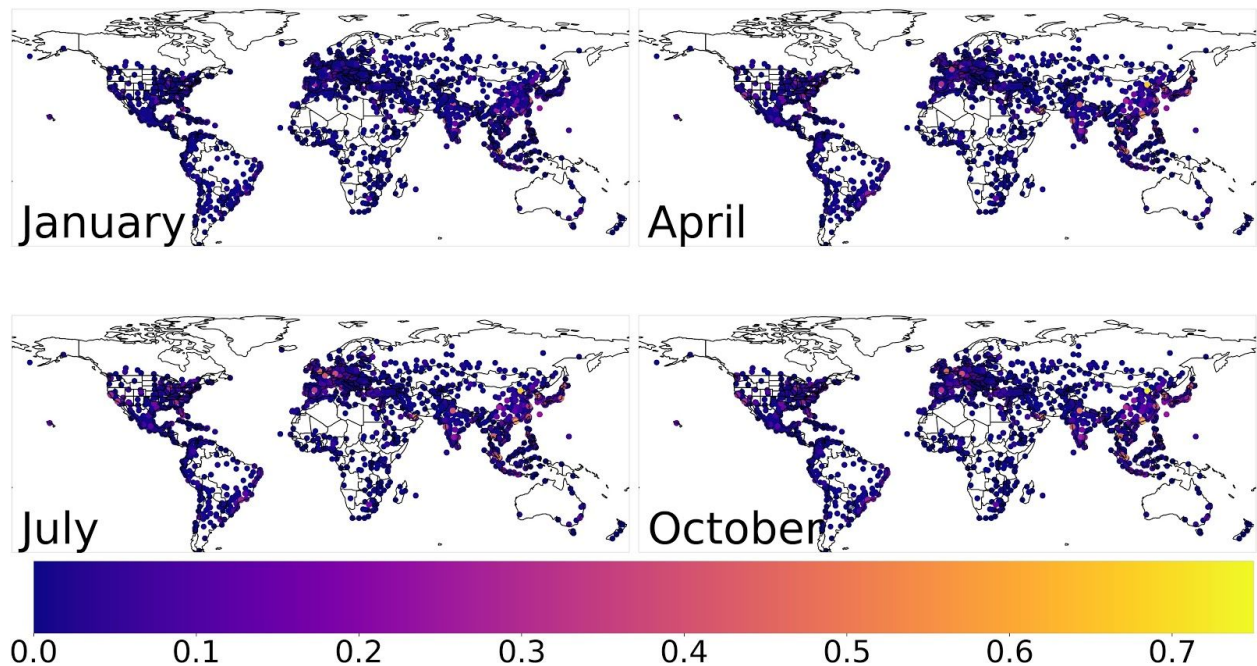

**Figure S1:** Risk measure for different months.

## Sensitivity Analyses

We performed two sensitivity analyses. The first was done for different values of the shape parameter  $\kappa$  of the gamma distribution of the infectious period (see Methods in the main text) The second was done for different values of  $R_0$ .

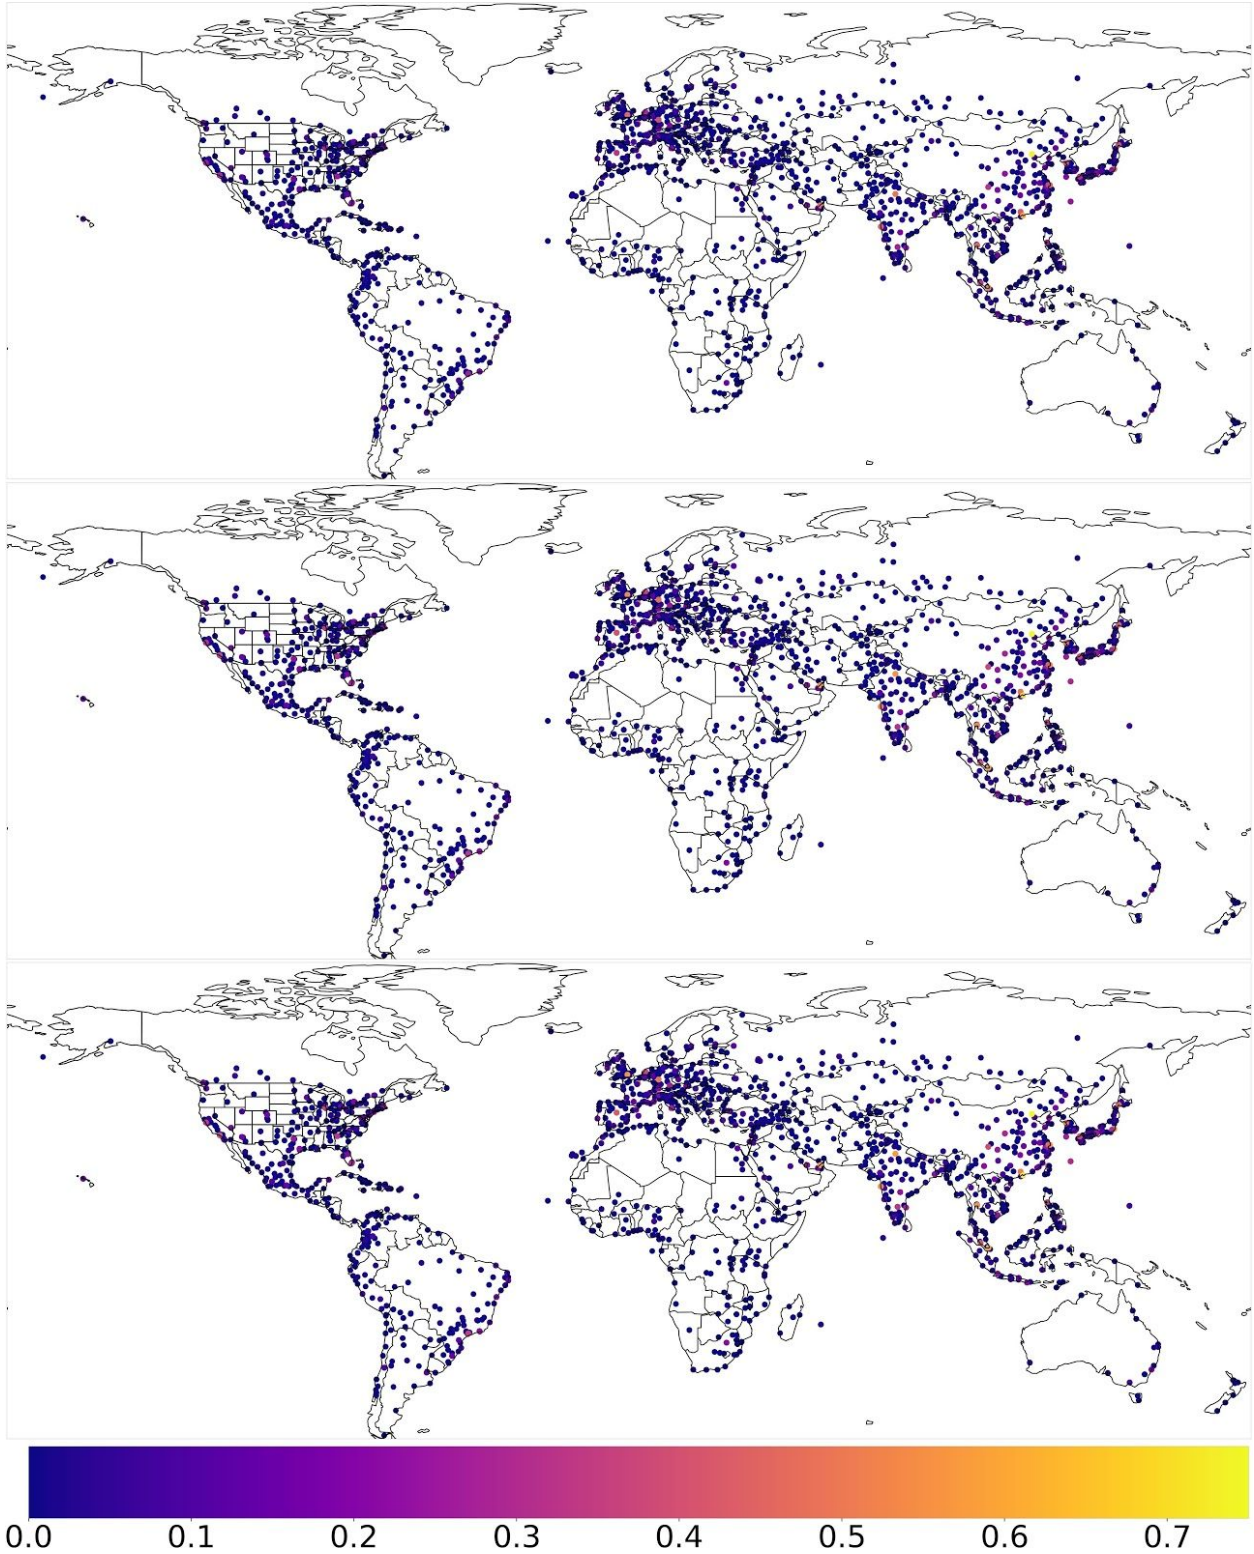

**Figure S2:** Risk measure for (top to bottom)  $\kappa = 1, 3, 6$ . Compare to figure(1.b) from the main text. Note that for visualization purposes, the color scale is truncated to [0,0.75].

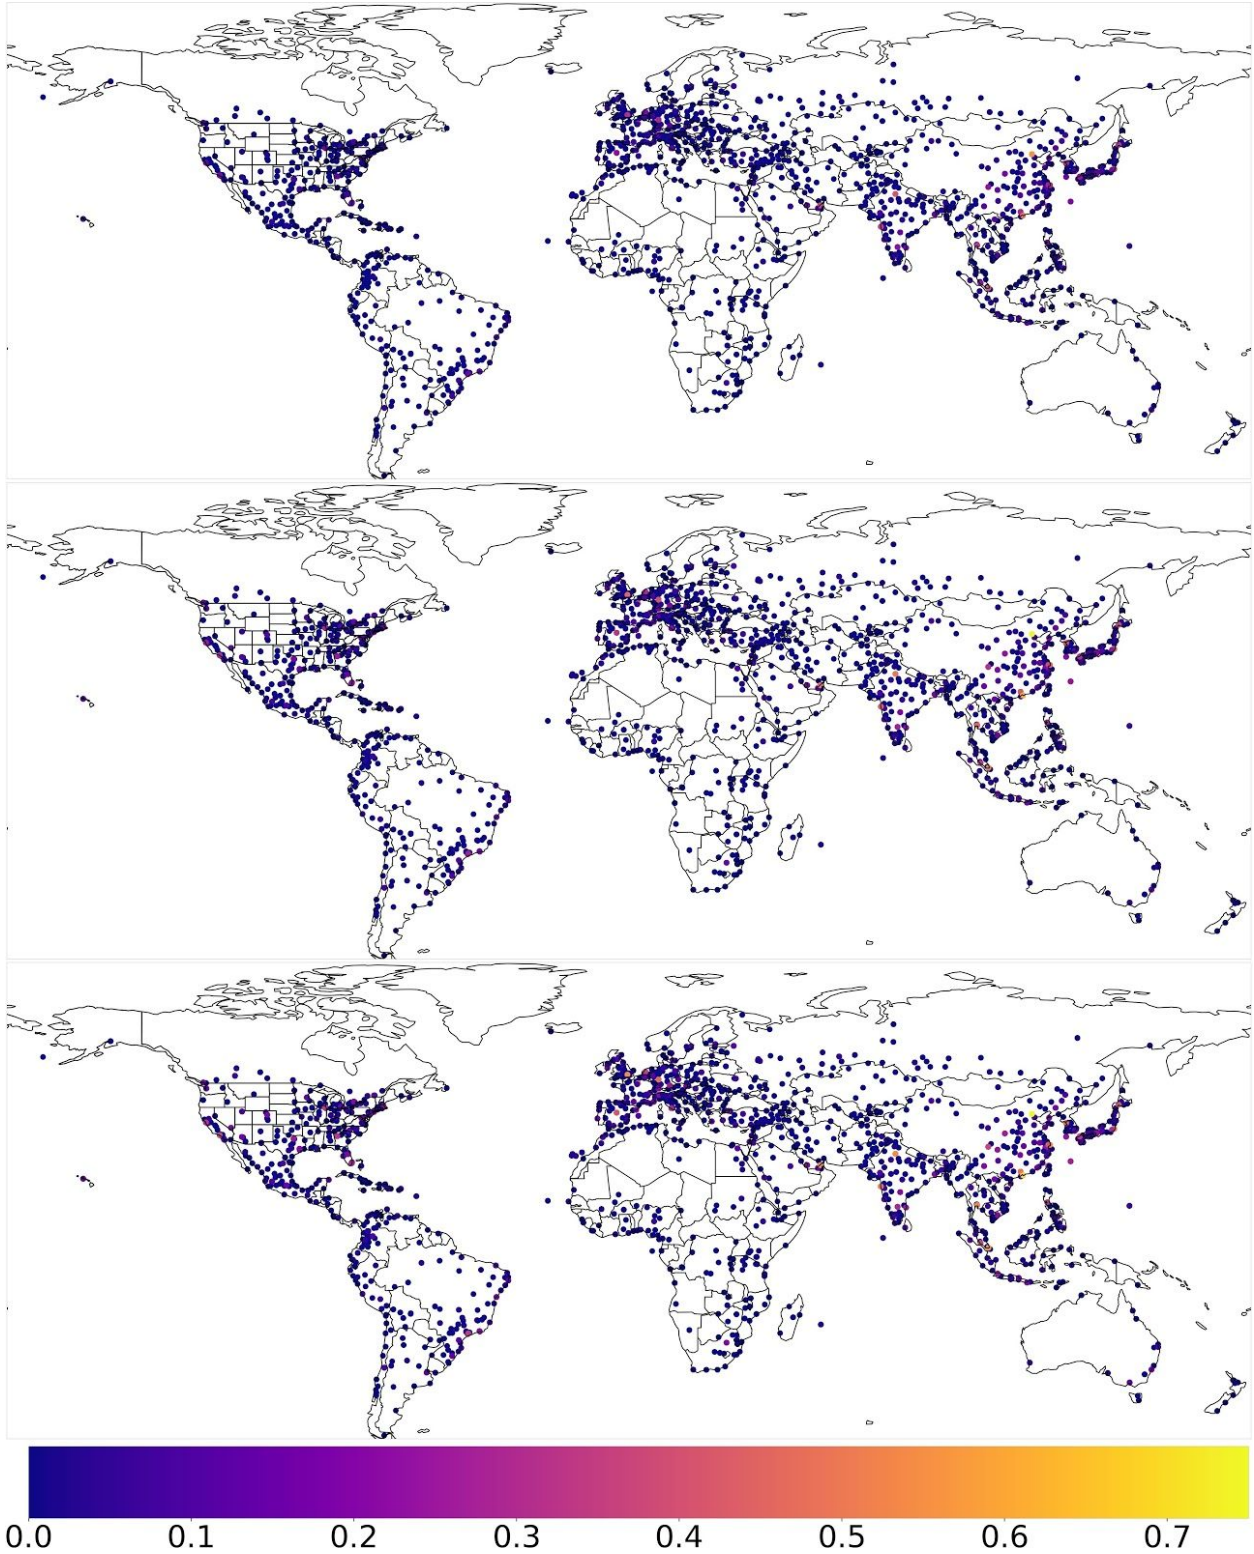

**Figure S3:** Risk measure for (top to bottom)  $R_0 = 2, 3, 4$ . Compare to figure (1.b) from the main text. Note that for visualization purposes, the color scale is truncated to [0,0.75].

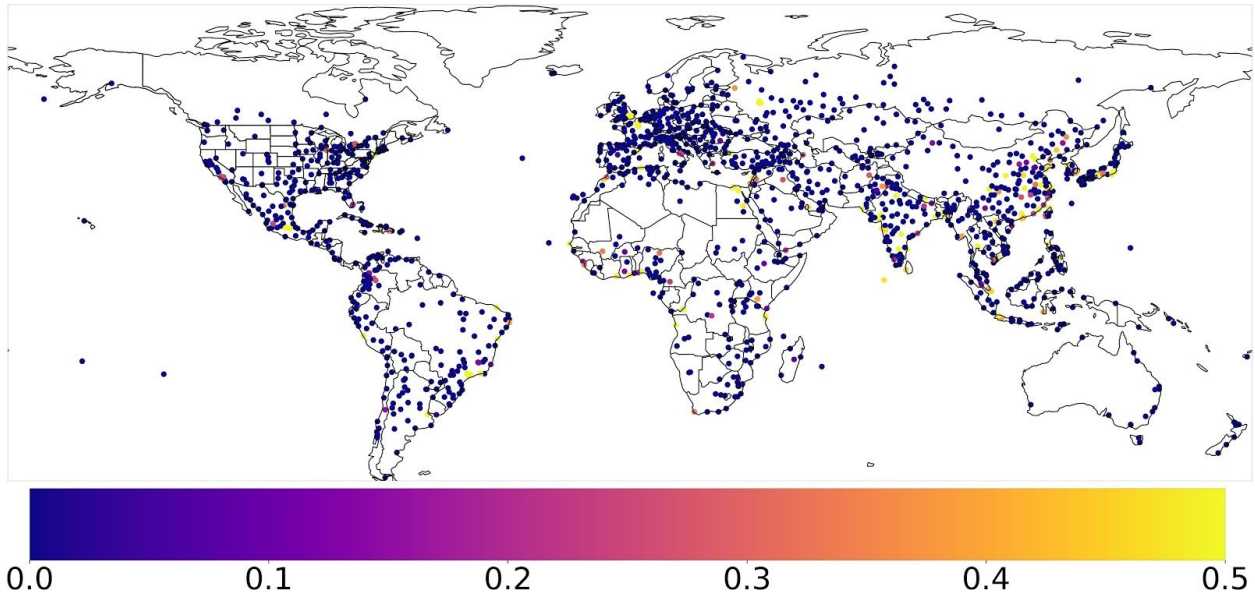

**Figure S4:** Likelihood of initiating an outbreak by introducing one sick individual in a city. Many of the cities most susceptible to outbreaks are in India and China. Note the scale is truncated to [0,0.5].
